## RESEARCH ARTICLE

# Effects of Na<sup>+</sup> channel isoforms and cellular environment on temperature tolerance of cardiac Na<sup>+</sup> current in zebrafish (*Danio rerio*) and rainbow trout (*Oncorhynchus mykiss*)

Jaakko Haverinen<sup>1,\*</sup>, Irina Dzhumaniiazova<sup>2</sup>, Denis V. Abramochkin<sup>2,3,4</sup>, Minna Hassinen<sup>1</sup> and Matti Vornanen<sup>1</sup>

**ABSTRACT**

Heat tolerance of heart rate in fish is suggested to be limited by impaired electrical excitation of the ventricle due to the antagonistic effects of high temperature on Na<sup>+</sup> ( $I_{Na}$ ) and K<sup>+</sup> ( $I_{K1}$ ) ion currents ( $I_{Na}$  is depressed at high temperatures while  $I_{K1}$  is resistant to them). To examine the role of Na<sup>+</sup> channel proteins in heat tolerance of  $I_{Na}$ , we compared temperature dependencies of zebrafish (*Danio rerio*, warm-dwelling subtropical species) and rainbow trout (*Oncorhynchus mykiss*, cold-active temperate species) ventricular  $I_{Na}$ , and  $I_{Na}$  generated by the cloned zebrafish and rainbow trout Na<sub>v</sub>1.4 and Na<sub>v</sub>1.5 Na<sup>+</sup> channels in human embryonic kidney (HEK) cells. Whole-cell patch-clamp recordings showed that zebrafish ventricular  $I_{Na}$  has better heat tolerance and slower inactivation kinetics than rainbow trout ventricular  $I_{Na}$ . In contrast, heat tolerance and inactivation kinetics of zebrafish and rainbow trout Na<sub>v</sub>1.4 channels are similar when expressed in the identical cellular environment of HEK cells. The same applies to Na<sub>v</sub>1.5 channels. These findings indicate that thermal adaptation of ventricular  $I_{Na}$  is largely achieved by differential expression of Na<sup>+</sup> channel alpha subunits: zebrafish that tolerate higher temperatures mainly express the slower Na<sub>v</sub>1.5 isoform, while rainbow trout that prefer cold waters mainly express the faster Na<sub>v</sub>1.4 isoform. Differences in elasticity (stiffness) of the lipid bilayer and/or accessory protein subunits of the channel assembly may also be involved in thermal adaptation of  $I_{Na}$ . The results are consistent with the hypothesis that slow Na<sup>+</sup> channel kinetics are associated with increased heat tolerance of cardiac excitation.

**KEY WORDS:** Atrioventricular block, Cardiac sodium channels, Electrical excitation, Heart rate, Thermal adaptation

**INTRODUCTION**

Temperature is a major environmental factor that has exerted a strong selective pressure on animal life forms. Temperature-driven evolution has led to significant variation in thermal tolerance of ectothermic vertebrates, including fishes (Beitinger, 2000; Johnston and Bennett, 2008). Some fish species are adapted to a relatively

narrow range of temperatures such as the stenothermic teleosts of the Antarctic Ocean and the polar cod (*Boreogadus saida*) of the Arctic Ocean (Somero and DeVries, 1967; Beers and Sidell, 2011; Drost et al., 2016; Abramochkin et al., 2019). In temperate climates, fishes usually have a wider thermal tolerance range, e.g. rainbow trout (*Oncorhynchus mykiss*) are cold-water fish that survive temperatures between 0 and 28°C (Hokanson et al., 1977; Beitinger, 2000). The zebrafish (*Danio rerio*), a teleost fish of the lakes and rivers of South-eastern Asia, also tolerates a wide temperature range (7–41°C) but occupies warmer habitats than rainbow trout (Cortemeglia and Beitinger, 2005; López-Olmeda and Sánchez-Vázquez, 2011).

Despite considerable research efforts, the physiological basis for the high temperature tolerance of fishes and other ectotherms remains unresolved. Practically all major processes and functions of the animal body (e.g. circulation, sensory/motor functions, behaviour, metabolism, digestion, immune defence, reproduction) are affected by temperature and therefore more or less adapted to the habitat temperature of the animal (Angilletta et al., 2002; Gracey et al., 2004; Podrabsky and Somero, 2004; Vornanen et al., 2005; MacMillan, 2019). Therefore, it is likely that when approaching the upper temperature tolerance limit of an animal, several processes simultaneously weaken in the animal's body, but the severity of their effect at the organismal level may vary and manifest with varying delays (Vornanen, 2020). Alternatively, different processes/functions may have slightly different thermal optima or failure temperatures, depending for example on the level of biological organization where the process/function appears (Lagerspetz, 1987; Clark et al., 2013). A fundamental question arises: is there a single underlying process or interaction principle that drives the thermal collapse of multiple organ systems? Given that similar thermal limitations appear to apply to unicellular organisms and Metazoa, it has been suggested that the limiting processes of animal life are found at the molecular level (Tattersall et al., 2012).

Electrical excitability is a common process for most tissues of the animal body including nerves, skeletal muscles, heart and smooth muscles. These tissues are responsible for almost all vital functions of the animal body like sensation, learning, behaviour, locomotion, blood circulation, digestion and homeostasis of the body (Hille, 2001). Recently, we have gathered evidence showing that high temperatures can impair electrical excitability and therefore potentially limit the upper thermal tolerance of both ectothermic and endothermic animals (Vornanen, 2020). Electrical excitability or generation of propagating action potentials (APs) is the result of interaction between inward and outward directed flow of ions across the plasma membrane. In studies on thermal tolerance of electrical excitability we have used fish ventricular myocytes as a model system, as they are well suited for patch-clamp experiments. Atrial myocytes are a less suitable model as they fail to maintain stable resting potential in the current-clamp mode of patch-clamp due to

<sup>1</sup>Department of Environmental and Biological Sciences, University of Eastern Finland, 80101 Joensuu, Finland. <sup>2</sup>Department of Human and Animal Physiology, Lomonosov Moscow State University, Leninskiye Gory 1-12, 119234 Moscow, Russia. <sup>3</sup>Laboratory of Cardiac Electrophysiology, National Medical Research Center for Cardiology, 3rd Cherepkovskaya 15a, 121552 Moscow, Russia. <sup>4</sup>Department of Physiology, Pirogov Russian National Research Medical University, Ostrovityanova Str. 1, 117997 Moscow, Russia.

\*Author for correspondence (jaakko.haverinen@uef.fi)

© J.H., 0000-0002-2300-6849; I.D., 0000-0001-5167-2112; D.V.A., 0000-0001-5751-8853; M.H., 0000-0002-2653-3708; M.V., 0000-0003-0953-1425

the tiny background inward rectifier current ( $I_{K1}$ ) and the absence of acetylcholine-dependent inward rectifier current ( $I_{KACH}$ ) in isolated cells (Vornanen et al., 2002; Molina et al., 2007). In a quiescent ventricular myocyte, there is a negative resting membrane potential ( $V_{rest}$ ), which is maintained by  $K^+$  efflux via  $I_{K1}$ . For initiation and propagation of cardiac AP,  $V_{rest}$  must be depolarized to the threshold potential ( $V_{th}$ ) of an AP. This is accomplished by  $Na^+$  influx through the voltage-gated  $Na^+$  channels, which generate the sodium current ( $I_{Na}$ ). AP is initiated only when the charge transfer of the inward  $I_{Na}$  (the source current) exceeds the charge transfer of the outward  $I_{K1}$  (the sink current or resting membrane leak). At high temperatures, electrical excitability of fish ventricular myocytes may fail due to mismatch between the source current ( $I_{Na}$ ) and the sink current ( $I_{K1}$ ) (Vornanen et al., 2014). Acute warming reduces charge transfer via the  $I_{Na}$ , while  $K^+$  leak via  $I_{K1}$  increases:  $I_{Na}$  fails to depolarize  $V_{rest}$  to the threshold potential of AP. At the level of a working heart this appears as atrioventricular block and depression of ventricular beating rate (Haverinen and Vornanen, 2020), which may eventually result in a collapse of cardiac output and thermal death of the fish.

The present study aimed to test the source–sink mismatch hypothesis with respect to the source current,  $I_{Na}$  (Vornanen, 2020). Given the differences in temperature tolerances between rainbow trout (a cold-active temperate species) and zebrafish (a warm-dwelling subtropical species), it was hypothesized that thermal tolerance of the zebrafish  $I_{Na}$  is higher than that of the rainbow trout  $I_{Na}$ . This assumption was tested by comparing  $I_{Na}$  of zebrafish and rainbow trout ventricular myocytes at different temperatures. Another prediction of the source–sink hypothesis is that the channels that generate currents with slow gating kinetics can withstand high temperatures better than channels that produce currents with fast kinetics (Touska et al., 2018; Vornanen, 2020). This is based on the assumption that stiffer molecules have higher activation energy and slower kinetics, i.e. there is a trade-off between flexibility and thermal stability of the proteins (Somero, 1995; Zavodszky et al., 1998; Fields, 2001). Studies on mammalian  $Na^+$  channels have shown that the skeletal isoform,  $Na_v1.4$ , has faster inactivation kinetics than the cardiac isoform,  $Na_v1.5$  (Wang et al., 1996).  $I_{Na}$  with slow inactivation kinetics is able to provide more depolarizing charge at high temperature than  $I_{Na}$ , which is rapidly inactivated. As zebrafish and trout ventricular  $I_{Na}$  are mainly generated by  $Na_v1.5$  and  $Na_v1.4$  channels, respectively (Haverinen et al., 2007; Haverinen et al., 2018), it was hypothesized that those channel isoforms are involved in adaptation of cardiac  $I_{Na}$  to high and low temperature, respectively. To this end, the inactivation kinetics and charge transfer of  $I_{Na}$  between rainbow trout and zebrafish ventricular myocytes were compared at different temperatures.

Finally, it was hypothesized that thermal stability and kinetics of fish  $I_{Na}$  depend in part on the cellular environment (e.g. biophysical properties of the lipid membrane and/or ancillary protein subunits) where they are expressed. To test this, the two main alpha subunits of zebrafish and rainbow trout  $Na^+$  channels were cloned and expressed in a mammalian cell line, the human embryonic kidney (HEK) cell. This allowed comparison of inactivation kinetics and thermal resistance of the  $Na^+$  channels in an identical cellular environment.

## MATERIALS AND METHODS

### Animals

The wild-type zebrafish, *Danio rerio* (F. Hamilton 1822) (*ab* strain, kindly donated by Dr Maxim Lovat, Lomonosov Moscow State University), were raised and maintained at the animal facilities of Lomonosov Moscow State University according to common

practices (Westerfield, 2007). The rearing temperature of the fish was 28°C. Fish of either sex, about 1.5 years old, were used for electrophysiological experiments ( $N=8$ ). Zebrafish were killed by immersion in an ice-water bath and cutting of the spine. Rainbow trout, *Oncorhynchus mykiss* (Walbaum, 1792), were obtained from a local fish farm (Kontiolahti, Finland). Fish weighing  $118.7 \pm 20.6$  g ( $N=11$ ) of either sex, acclimated at 12°C for more than 3 weeks, were used in electrophysiological experiments and gene cloning. Trout were stunned by a quick blow to the head and killed by cutting of the spine immediately behind the head. The experiments conform to the ‘European Convention for the Protection of Vertebrate Animals used for Experimental and other Scientific Purposes’ (Council of Europe No. 123, Strasbourg 1985) and were authorized by the national animal experimental board in Finland (permission ESAVI/8877/2019).

### Cloning of *SCN5LA* and *SCN4A* $Na^+$ channel genes of zebrafish and rainbow trout

Total cardiac RNA was extracted by TriReagent (Thermo Fisher Scientific, Vilnius, Lithuania) and the quality and quantity of RNA were determined by agarose gel electrophoresis and NanoDrop ND-1000 Spectrophotometer (NanoDrop Technologies, Wilmington, DE, USA), respectively. RNA (2  $\mu$ g) was treated with RNase free DNase (Thermo Fisher Scientific) and converted to cDNA using SuperScript IV reverse transcriptase (Invitrogen, Glasgow, UK) and oligo(dT) primers. cDNA (1  $\mu$ l) was used as a template in 25  $\mu$ l polymerase chain reaction (PCR) including a final concentration of 0.2 mmol l<sup>-1</sup> dNTP mix, 0.2 mmol l<sup>-1</sup> primers (synthesized by Invitrogen) as shown in Table 1, and 0.02 U  $\mu$ l<sup>-1</sup> Phusion High Fidelity DNA polymerase (Thermo Fisher Scientific). Cycling conditions for all PCR reactions were as follows: initial denaturation at 98°C for 1 min, 35 cycles at 98°C for 10 s, at 60°C for 30 s and at 72°C for 100–260 s (40 s per kb; for the length of the products see Table 1), followed by final extension at 72°C for 5 min. The PCR products were separated on a 0.8% agarose gel, and the nucleotide chains were extracted from the gel using a GeneJET Gel Extraction Kit (Thermo Fisher Scientific). Overhang adenines were added to the 3'-ends of PCR products using Dynazyme II DNA polymerase (Thermo Fisher Scientific) and products were ligated into the pGEM-T Easy vector (Promega, Madison, WI, USA). The inserts were digested from the pGEM-T Easy vector and directionally cloned into the expression vector. If the coding sequence of the *SCN* gene was amplified by PCR in two parts, the pieces were ligated into the expression vector to form the entire coding sequence. Coding sequences of the *SCN5LA* genes of rainbow trout (*om* for *O. mykiss*) and zebrafish (*dr* for *D. rerio*) were cloned into the expression vector pcDNA3.1/Zeo(+) (Invitrogen). Several attempts to clone the full-length *om/dr-SCN4A* into the pcDNA3.1 failed. To overcome this problem, the high-copy number vector pcDNA3.1/Zeo(+) was converted to a low-copy number vector that was better tolerated by bacterial cells. To this end, the ColE1 origin was replaced by the pMB1 origin via digesting pcDNA3.1/Zeo(+) with BsmI and PvuI and replacing this fragment (bases 2768–4462) with the digested fragment from pBR322 (bases 1353–3733). The coding sequences of *dr/om-SCN4A* were successfully cloned into this modified vector. Plasmids were isolated using PureLink HiPure Plasmid Midiprep Kit (Thermo Fisher Scientific) and sequenced by GATC Biotech AB (Köln, Germany). Nucleotide sequences were converted to protein sequences using EMBOSS Transeq software ([https://www.ebi.ac.uk/Tools/st/emboss\\_transeq/](https://www.ebi.ac.uk/Tools/st/emboss_transeq/)), and the protein sequences of the species-specific isoforms were aligned with EMBOSS Needle ([https://www.ebi.ac.uk/Tools/psa/emboss\\_needle/](https://www.ebi.ac.uk/Tools/psa/emboss_needle/)). The fish *SCN4A* and *SCN5LA*

**Table 1. Primers used in cloning of the *SCN* genes of rainbow trout and zebrafish**

| Target gene      | Accession number | Primers in 5'–3' orientation | Amplified region* | Product length (bp) |
|------------------|------------------|------------------------------|-------------------|---------------------|
| <i>drSCN4Ab</i>  | NM_001045065     | F: tgtaagaatggcgctct         | –7 to 2562        | 2569                |
|                  |                  | R: gcgtcggcctctccatttac      | 2296 to +238      | 3489                |
| <i>drSCN5LAb</i> | NM_001045123     | F: ggcatgtgcatcatcgctct      |                   |                     |
|                  |                  | R: tcattggcaggttctgagcat     |                   |                     |
| <i>omSCN4Abb</i> | XM_021624591     | F: atggcagccatactgtttcc      | 1 to 3384         | 3384                |
|                  |                  | R: ctccgacgtgtgatgtcac       | 2770 to +9 bp     | 3105                |
| <i>omSCN5LAb</i> | XM_021562569     | F: ctctcttggctttgctgct       |                   |                     |
|                  |                  | R: gttttgctgcacagaaaagt      |                   |                     |
| <i>omSCN4Abb</i> | XM_021624591     | F: aggcacaaccgtagtgtgaa      | –44 to 2848       | 2892                |
|                  |                  | R: atgggtacatccagggtcaa      | 140 to 5565       | 5426                |
| <i>omSCN5LAb</i> | XM_021562569     | F: agcagaatccaagatggtc       |                   |                     |
|                  |                  | R: tcaaacatcggactcttcag      |                   |                     |
| <i>omSCN5LAb</i> | XM_021562569     | F: ataagaatggccaccctg        | –8 to +632        | 6530                |
|                  |                  | R: tcccggtatcttctacgtg       |                   |                     |

\*Minus sign denotes bases of 5' untranslated region upstream from the start codon; plus sign denotes bases of 3' untranslated region downstream from the stop codon. F, forward; R, reverse; bp, base pair.

genes are orthologous to the mammalian *SCN4A* and *SCN5A* genes. For simplicity, the protein names ( $\text{Na}_v1.4$  and  $\text{Na}_v1.5$ ) of the orthologous genes are used throughout the text.

### Heterologous expression of *SCN4A* and *SCN5LA* genes

Due to the whole genome duplications of the teleost lineage, the number of gene paralogues expressed in fish striated muscles is high (Alderman et al., 2012; Glasauer and Neuhaus, 2014). All eight teleost  $\text{Na}^+$  channel genes are expressed in the heart of both zebrafish and rainbow trout (Haverinen et al., 2018; Hassinen et al., 2021). Because striated muscle isoforms,  $\text{Na}_v1.4$  and  $\text{Na}_v1.5$ , make up the great majority (>99%) of all  $\text{Na}^+$  channel transcripts in zebrafish and trout hearts, genes for heterologous expression were selected from these paralogues. For both  $\text{Na}_v1.5$  and  $\text{Na}_v1.4$ , there are three paralogues in the trout genome and two paralogues in the zebrafish genome. For  $\text{Na}_v1.5$  channels, *drSCN5LAb* and *omSCN5LAb*, the most abundant paralogues of ventricular myocytes, were expressed in HEK cells. For the expression of zebrafish  $\text{Na}_v1.4$  channels, *drSCN4Ab*, the most abundantly expressed *SCN4* paralogue of ventricular myocytes, was inserted in HEK cells. In the case of trout  $\text{Na}_v1.4$  channels, *omSCN4Abb*, the second most abundant *SCN4A* paralogue of ventricular myocytes (most abundant in atrial myocytes) was expressed in HEK cells. We failed to clone the most abundant paralogue of the ventricle, *omSCN4Aba*, and were therefore forced to use the major atrial isoform, *omSCN4Abb*. Human embryonic kidney (HEK293; ECACC) cells were grown at 37°C in DMEM (Biowest) supplemented with 10% fetal bovine serum (FBS, sterile-filtered and heat inactivated; Sigma-Aldrich) and 100 U ml<sup>-1</sup> penicillin and streptomycin (Sigma-Aldrich) in a 5% CO<sub>2</sub> environment. HEK cells were transiently co-transfected with pEGFP-N1 (Clontech), and either *drSCN4Ab*, *drSCN5LAb*, *omSCN4Abb* or *omSCN5LAb* construct using TurboFect transfection reagent (Thermo Fisher Scientific). Cells were transfected for 16–18 h at 37°C; plate medium was then refreshed, and the cells were further incubated at 28°C in a 5% CO<sub>2</sub> environment for at least 24 h. Incubation at lower temperature increased the expression level of  $\text{Na}^+$  channels. Whole-cell patch-clamp experiments were conducted 48–72 h after transfection.

### Patch-clamp measurements of $\text{Na}^+$ current in fish cardiac myocytes and HEK cells

The procedure of isolating zebrafish cardiomyocytes was essentially similar to the original method of isolating crucian carp (*Carassius carassius*) cardiac cells (Vornanen, 1997), but scaled down to the

size of small zebrafish hearts and using slightly higher enzyme concentrations (1 mg ml<sup>-1</sup> collagenase Type IA and 0.67 mg ml<sup>-1</sup> Trypsin IV; both from Sigma). A blunt-ended syringe needle (34 gauge, TE734025; Adhesive Dispensing Ltd, Milton Keynes, UK) cannula was inserted via the bulbus arteriosus into the ventricle and secured in place with a fine thread. The heart was perfused first with Ca<sup>2+</sup>-free solution for 5 min and then with the same solution but with added hydrolytic enzymes together with fatty acid-free serum albumin (1 mg ml<sup>-1</sup>; Sigma) for 25–30 min. Myocytes were stored at 5°C and used on the same day as they were isolated. The Ca<sup>2+</sup>-free solution contained (mmol l<sup>-1</sup>): 100 NaCl, 10 KCl, 1.2 KH<sub>2</sub>PO<sub>4</sub>, 4 MgSO<sub>4</sub>, 50 taurine, 20 glucose and 10 HEPES at pH 6.9 (adjusted with KOH at 20°C). From rainbow trout heart, myocytes were obtained using essentially the same procedure, but with lower enzyme concentrations (0.75 mg ml<sup>-1</sup> collagenase Type IA and 0.5 mg ml<sup>-1</sup> Trypsin IV) and shorter digestion time (10–12 min).

The whole-cell voltage-clamp recording of  $I_{\text{Na}}$  was performed using an Axopatch 200B or an Axopatch 1-D amplifier (Molecular Devices, San Jose, CA, USA) as previously described in detail (Haverinen et al., 2018). Cardiac myocytes or coverslips containing cultured HEK cells were placed in a small chamber with a continuous flow of K<sup>+</sup>-based external saline solution containing (mmol l<sup>-1</sup>): 150 NaCl, 5.4 KCl, 1.8 CaCl<sub>2</sub>, 1.2 MgCl<sub>2</sub>, 10 glucose and 10 HEPES, with pH adjusted to 7.7 at 20°C with NaOH. The temperature of the saline solution was set using a Peltier device (CL-100, Warner Instruments, Hamden, CT, USA; or TC-10, Dagan, Minneapolis, MN, USA) and monitored continuously with thermistors placed close to the cells. Patch pipettes with a resistance of 1.5–2.5 MΩ were drawn from borosilicate glass (Hilgenberg GmbH, Malsfeld, Germany) and filled with Cs<sup>+</sup>-based electrode solution containing (mmol l<sup>-1</sup>): 5 NaCl, 130 CsCl, 1 MgCl<sub>2</sub>, 5 EGTA, 5 Mg<sub>2</sub>ATP and 5 HEPES, with pH adjusted to 7.2 with CsOH. Current amplitudes were normalized to the capacitive cell size to obtain current density (pA pF<sup>-1</sup>).

During  $I_{\text{Na}}$  recording, myocytes were superfused with a Cs-based low-Na<sup>+</sup> external saline solution, which contained (mmol l<sup>-1</sup>): 20 NaCl, 120 CsCl, 1 MgCl<sub>2</sub>, 0.5 CaCl<sub>2</sub>, 10 glucose and 10 HEPES at pH 7.7 (adjusted with CsOH at 20°C) (Haverinen and Vornanen, 2004). In experiments with cardiac myocytes, nifedipine (10 μmol l<sup>-1</sup>; Sigma) was included to block  $I_{\text{Ca}}$ . The low concentration of Na<sup>+</sup> outside the cell reduced the driving force for Na<sup>+</sup> influx and made it possible to achieve stable and complete voltage control of  $I_{\text{Na}}$ . Approximately 80% of the series resistance was compensated for when recording fast and large  $I_{\text{Na}}$ .  $I_{\text{Na}}$  was



leakage-corrected using the P/N procedure of Clampex 9.2 software. For determination of the current–voltage ( $I$ – $V$ ) relationship,  $I_{\text{Na}}$  was elicited from the holding potential of  $-120$  mV with 60 ms depolarizing pulses (range  $-100$  to  $+70$  mV) at a frequency of 1 Hz (Fig. 1A). The voltage dependence of  $\text{Na}^+$  channel conductance was calculated from the  $I$ – $V$  recordings using the equation:  $G_{\text{Na}}=I_{\text{Na}}/(V-V_{\text{rev}})$ , where  $G_{\text{Na}}$  is the  $\text{Na}^+$  conductance of the membrane,  $I_{\text{Na}}$  is the peak current at a given membrane potential ( $V$ ) and  $V_{\text{rev}}$  is the reversal potential of  $I_{\text{Na}}$ . The steady-state (SS) voltage dependence of activation was obtained by plotting the normalized conductance ( $G/G_{\text{max}}$ ) as a function of membrane potential and fitting it into the equation of Boltzmann distribution:

$$y = 1 / \left( 1 + \frac{\exp(V - V_{0.5})}{S} \right), \quad (1)$$

where  $V$  is membrane potential,  $V_{0.5}$  the midpoint potential and  $S$  is the slope of the curve. SS inactivation was determined using a two-step protocol where a 300 ms conditioning pulse to potentials between  $-110$  and  $-20$  mV was followed by a 60 ms test pulse to  $-20$  mV. The normalized test pulse currents ( $I/I_{\text{max}}$ ) were plotted as a function of membrane potential and fitted to the Boltzmann function with a negative slope ( $-S$ ).

The time constant of  $I_{\text{Na}}$  inactivation at different membrane potentials ( $-30$  to  $0$  mV) was derived by fitting the decay phase of  $I_{\text{Na}}$  using the double exponential function of the Chebyshev transformation procedure of the Clampfit 10.3 software package. The amplitude of the fast component ( $\tau_f$ ) was over 90% of the current. The slow component could only be reliably determined at the voltages at which  $I_{\text{Na}}$  was close to its peak amplitude. Therefore, only the results of  $\tau_f$  are reported. Thermal coefficient ( $Q_{10}$ ) values of  $I_{\text{Na}}$  inactivation rate were calculated using the equation:  $Q_{10}=(R_2/R_1)^{10^\circ\text{C}/(T_2-T_1)}$ , where  $R_1$  and  $R_2$  are fast time constants of inactivation ( $\tau_f$ ) at temperatures  $T_1$  and  $T_2$ .

All mentioned properties of  $I_{\text{Na}}$  were analysed in native trout or zebrafish myocytes and HEK cells expressing  $\text{Na}_v1.4$  or  $\text{Na}_v1.5$  channels at three different temperatures: 12, 20 and  $28^\circ\text{C}$ . However, additional experiments to estimate the dynamics of the temperature dependence of  $I_{\text{Na}}$  were done using the ‘heat ramp’ protocol. In these experiments  $I_{\text{Na}}$  was elicited by repetitive depolarizations to  $-20$  mV and the temperature was steadily raised from 12 to  $28^\circ\text{C}$  (up to  $39^\circ\text{C}$  in the case of native zebrafish myocytes).

### Statistics

Statistical analyses were performed using SPSS (IBM; version 25). One-way ANOVA (with Tukey’s or Dunnett’s  $T3$  *post hoc* test) and unpaired  $t$ -test were used to compare normally distributed data with homogenous variances. If the assumptions of parametric tests were not met, non-parametric Kruskal–Wallis and *post hoc* Mann–Whitney  $U$ -tests were used.  $P < 0.05$  was considered to show a statistically significant difference between means.

## RESULTS

### Temperature dependence of $I_{\text{Na}}$ density and charge transfer in zebrafish and rainbow trout ventricular myocytes

Temperature dependency of ventricular  $I_{\text{Na}}$  was markedly different between zebrafish and rainbow trout myocytes, as shown by the current–voltage ( $I$ – $V$ ) relationships (Fig. 1). In zebrafish myocytes, an acute rise of temperature from 12 to  $20^\circ\text{C}$  resulted in a significant increase in  $I_{\text{Na}}$  density at voltages between  $-50$  and  $-30$  mV

(Fig. 1C). A similar difference was detected in  $I_{\text{Na}}$  density between 12 and  $28^\circ\text{C}$  ( $P < 0.05$ ). However, the current densities at 20 and  $28^\circ\text{C}$  were almost identical, suggesting plateauing of  $I_{\text{Na}}$  in this temperature range (Fig. 1C). In rainbow trout myocytes, warming from 12 to  $20^\circ\text{C}$  increased  $I_{\text{Na}}$  density at voltages from  $-30$  to  $-10$  mV, but further warming to  $28^\circ\text{C}$  caused a strong depression of  $I_{\text{Na}}$  (Fig. 1E). Although the density of the zebrafish  $I_{\text{Na}}$  was higher at 20 and  $28^\circ\text{C}$  than at  $12^\circ\text{C}$ , the charge transfer (integral of  $I_{\text{Na}}$ ) was significantly smaller than at  $12^\circ\text{C}$  (Fig. 1D). In trout ventricular myocytes, the integral of  $I_{\text{Na}}$  decreased with increasing experimental temperature (Fig. 1F). Notably, charge transfer/ $I_{\text{Na}}$  density ratio, i.e. depolarizing power, was 4.5–22.2 times higher (at  $-20$  mV) for zebrafish than rainbow trout  $I_{\text{Na}}$  at all experimental temperatures (0.6, 0.7 and  $0.9 \text{ V A}^{-1}$  for rainbow trout and 2.7, 4.5 and  $20.0 \text{ V A}^{-1}$  for zebrafish at 28, 20 and  $12^\circ\text{C}$ , respectively).

Temperature tolerance of peak density and charge transfer of  $I_{\text{Na}}$  (at  $-20$  mV) were further studied using acute heat ramps. To this end, the cells were warmed from  $12^\circ\text{C}$  to their upper thermal tolerance limit while  $I_{\text{Na}}$  was elicited by depolarization from  $-100$  to  $-20$  mV for every second (Fig. 1G). Consistent with the  $I$ – $V$  data, there was a dramatic interspecies difference in temperature dependence of the peak  $I_{\text{Na}}$  (Fig. 1G). Initially, when the temperature was raised above  $12^\circ\text{C}$ , the density of  $I_{\text{Na}}$  increased in both species. However, the breakpoint temperature ( $T_{\text{BP}}$ , the temperature above which peak  $I_{\text{Na}}$  started to decrease steadily) was much lower for rainbow trout  $I_{\text{Na}}$  ( $18.3 \pm 0.6^\circ\text{C}$ ,  $N=13$ ) than for zebrafish  $I_{\text{Na}}$  ( $26.6 \pm 0.5^\circ\text{C}$ ,  $N=16$ ) ( $P < 0.05$ ).

Taken together, these findings indicate that the ventricular  $I_{\text{Na}}$  of rainbow trout heart is much less tolerant of high temperatures than the zebrafish ventricular  $I_{\text{Na}}$ .

### Inactivation kinetics of $I_{\text{Na}}$ in zebrafish and rainbow trout ventricular myocytes

Temperature dependence of  $I_{\text{Na}}$  inactivation kinetics was measured in the voltage range  $-30$  to  $0$  mV at 12, 20 and  $28^\circ\text{C}$  (Fig. 2). Kinetics of zebrafish or rainbow trout  $I_{\text{Na}}$  accelerated with increasing temperature and membrane depolarization. There was a striking difference in the rate of  $I_{\text{Na}}$  inactivation between trout and zebrafish ventricular myocytes (Fig. 2). At 12, 20 and  $28^\circ\text{C}$ , the time constant ( $\tau_f$ ) of  $I_{\text{Na}}$  inactivation (at  $0$  mV) was about 10.0, 6.3 and 4.0 times faster in rainbow trout ventricular myocytes in comparison with zebrafish ventricular myocytes ( $P < 0.05$ ).

### Steady-state activation and inactivation of $I_{\text{Na}}$ in zebrafish and rainbow trout ventricular myocytes

Voltage dependence of steady-state (SS) activation and inactivation of  $I_{\text{Na}}$  was studied at 12, 20 and  $28^\circ\text{C}$  (Fig. 3). In zebrafish ventricular myocytes, warming from 12 to  $20^\circ\text{C}$  and further to  $28^\circ\text{C}$  decreased the slope factor of the SS inactivation curve ( $P < 0.05$ ), while  $V_{0.5}$  remained unaffected ( $P > 0.05$ ; Fig. 3C; Table 2). Voltage dependence of SS activation of  $I_{\text{Na}}$  in zebrafish myocytes was more temperature sensitive, as warming to either 20 or  $28^\circ\text{C}$  shifted  $V_{0.5}$  to the left by almost 10 mV and decreased the slope factor ( $P < 0.05$ ) (Table 2; Fig. 3C). In trout ventricular myocytes, warming from 12 to  $20^\circ\text{C}$  and further to  $28^\circ\text{C}$  failed to shift  $V_{0.5}$  or change slope factor of both curves (Table 2; Fig. 3D).

### Temperature dependence of $I_{\text{Na}}$ density and charge transfer generated by $\text{Na}_v1.4$ or $\text{Na}_v1.5$ channels in HEK cells

Zebrafish and rainbow trout  $\text{Na}_v1.4$  and  $\text{Na}_v1.5$   $\text{Na}^+$  channels were expressed in the same cellular environment for a direct comparison between temperature dependencies of the orthologous gene

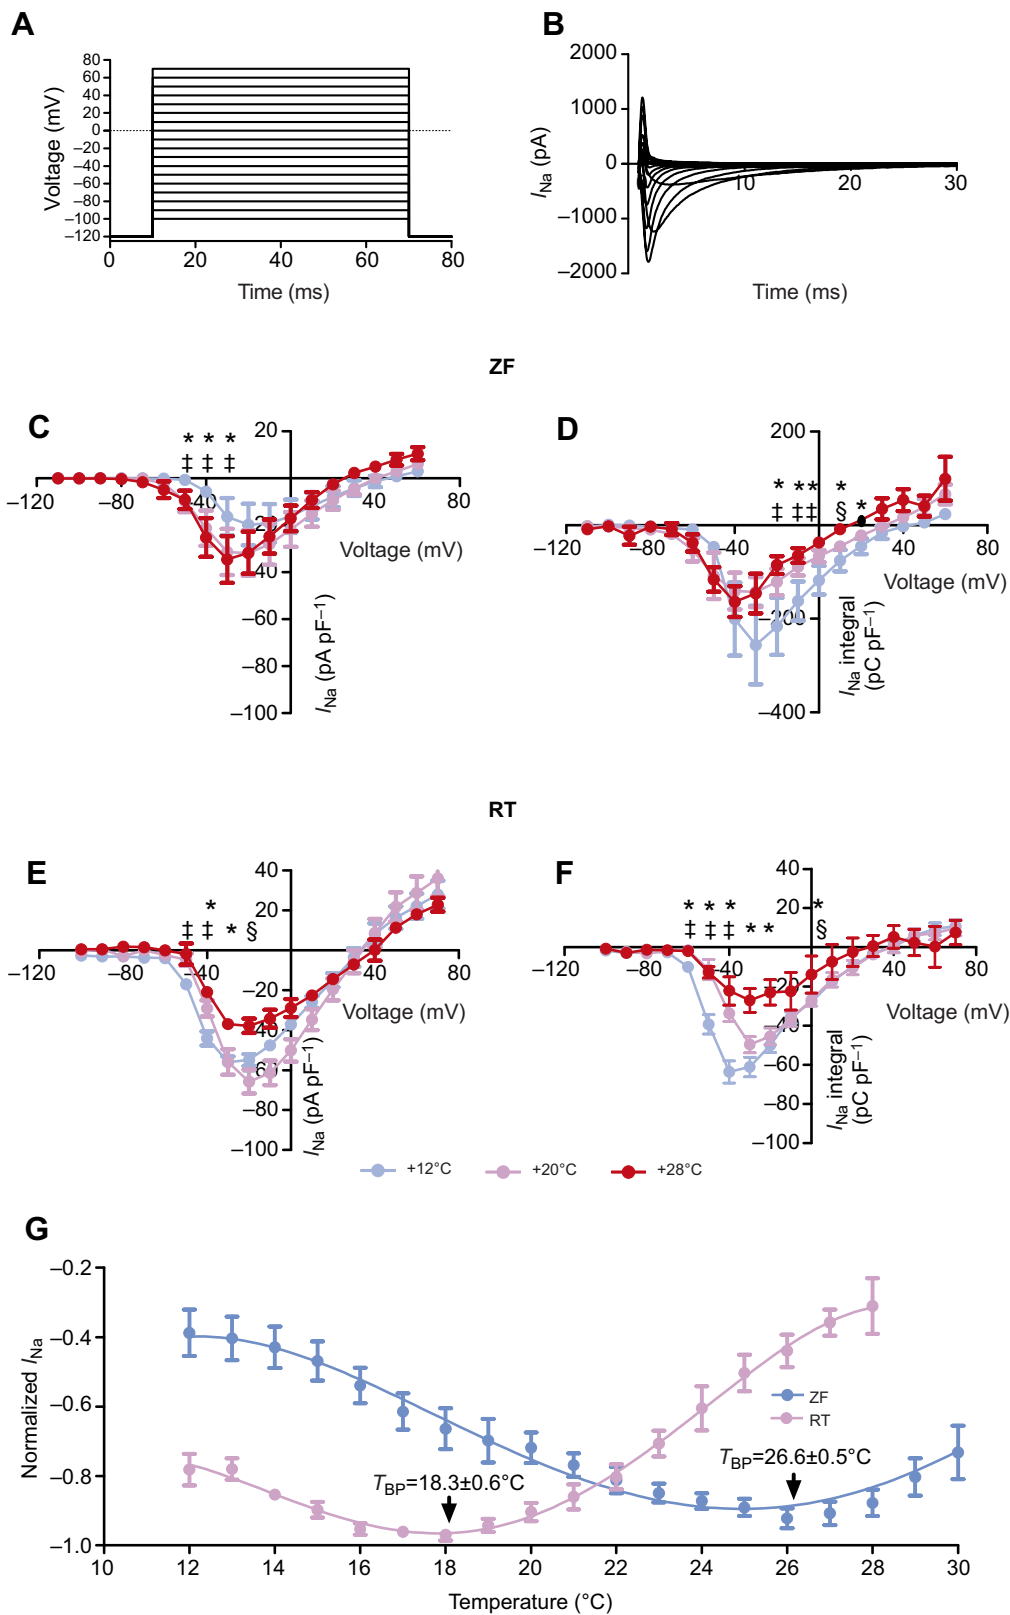

**Fig. 1. Voltage and temperature dependence of current density and charge transfer of  $I_{Na}$  in zebrafish and rainbow trout ventricular myocytes.**

(A) The voltage protocol used to elicit  $I_{Na}$ . (B) A representative recording from a zebrafish ventricular myocyte indicating tracings of  $I_{Na}$  at different membrane voltages. (C–F) Mean results ( $\pm$ s.e.m.) for current–voltage relationship and charge transfer of  $I_{Na}$  at three different temperatures for zebrafish (ZF;  $N=47$  myocytes from six fishes) (C,D) and rainbow trout (RT;  $N=33$  myocytes from six fishes) (E,F) ventricle. (G) Current density of  $I_{Na}$  in heat ramp experiments with zebrafish ( $N=10$  myocytes from two fishes) and rainbow trout ( $N=10$  myocytes from four fishes) ventricle. Statistically significant differences ( $P<0.05$ ) are shown as follows: \*12 versus 28°C; †12 versus 20°C; §20 versus 28°C.

products (Fig. 4). Protein sequences of these  $\text{Na}^+$  channels suggest a relatively high degree of structural similarity between the species. Trout and zebrafish  $\text{Na}_v1.4$  shared 64.5% identity and 76.0% similarity, whereas identity and similarity for  $\text{Na}_v1.5$  were 79.9 and 87.1%, respectively (Figs S1 and S2).

$I_{Na}$  generated by the zebrafish  $\text{Na}_v1.4$  channels responded to acute temperature increases in a similar manner to native ventricular  $I_{Na}$ : the current density increased, and the charge transfer decreased with increasing temperature (Fig. 4A,B).  $I_{Na}$  generated by the trout  $\text{Na}_v1.4$  channels did not show any statistically significant

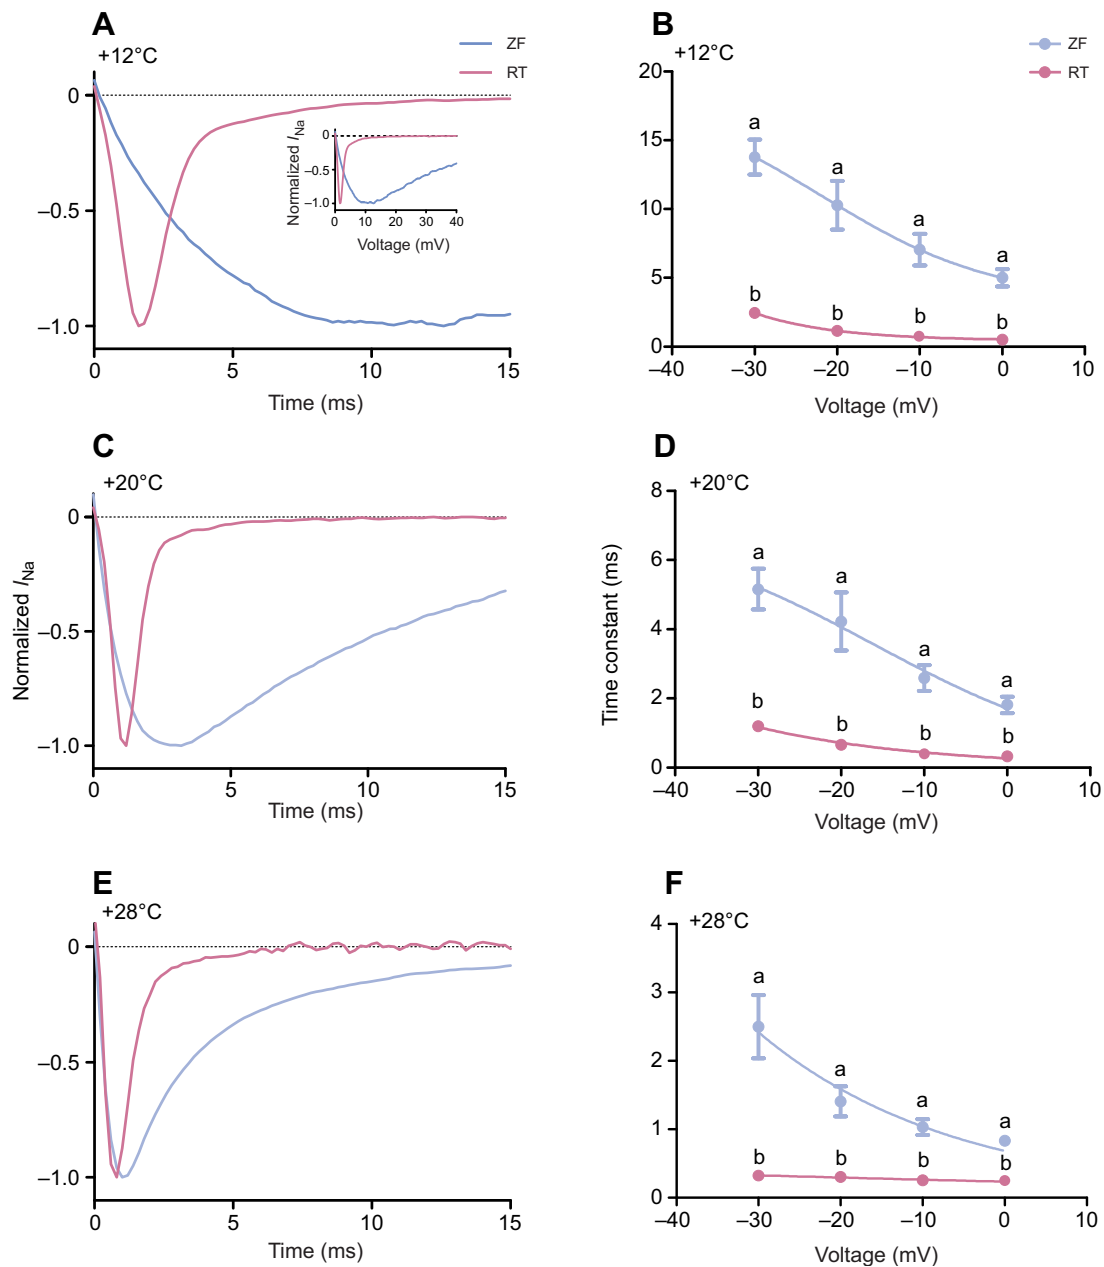

**Fig. 2.** Temperature dependence of inactivation kinetics of  $I_{Na}$  in zebrafish and rainbow trout ventricular myocytes.  $I_{Na}$  was elicited from a holding potential of  $-120$  mV to  $-30$  to  $0$  mV for  $30$  ms. (A,C,E) Representative tracings of  $I_{Na}$  at  $-20$  mV at temperatures of  $12^\circ\text{C}$  (A),  $20^\circ\text{C}$  (C) and  $28^\circ\text{C}$  (E). (B,D,F) Means ( $\pm$ s.e.m.) of inactivation time constant ( $\tau$ ) at  $12^\circ\text{C}$  (B),  $20^\circ\text{C}$  (D) and  $28^\circ\text{C}$  (F). The results are from  $31$  and  $30$  myocytes from six zebrafish (ZF) and four rainbow trout (RT), respectively. Error bars of RT data are smaller than the size of the symbols. Statistically significant differences ( $P < 0.05$ ) between ZF and RT are shown by dissimilar letters (a and b).

differences between the three temperatures for either current density or charge transfer (Fig. 4C,D). (The expression level of trout  $\text{Na}_V1.4$  channels in HEK cells was much lower than zebrafish  $\text{Na}_V1.4$  channels, which may have reduced the resolution of the analysis.) The  $I_{Na}$  generated by trout  $\text{Na}_V1.5$  channels was, however, much more heat tolerant than the native trout ventricular  $I_{Na}$ : current density and charge transfer strongly increased with increasing temperature in HEK cells (Fig. 4G,H), while in ventricular myocytes both variables were strongly reduced at  $28^\circ\text{C}$  (Fig. 1E,F).

$I_{Na}$  density of the zebrafish  $\text{Na}_V1.5$  channels in HEK cells increased with increasing temperature ( $P < 0.05$ ) (Fig. 4E).

Differently from ventricular  $I_{Na}$ , the heterologously expressed  $\text{Na}_V1.5$  channels positively responded to warming (at  $-50$  mV) up to  $28^\circ\text{C}$ , i.e.  $I_{Na}$  indicated a better heat tolerance in HEK cell membranes than in ventricular myocytes. No statistically significant differences were found in charge transfer by the heterologously expressed  $\text{Na}_V1.5$  channels (Fig. 4F).  $I_{Na}$  density of the rainbow trout  $\text{Na}_V1.5$  channels in HEK cells increased with warming from  $12$  to  $28^\circ\text{C}$  (Fig. 4G). This is a striking deviation from the thermal response of the ventricular  $I_{Na}$ , which was strongly depressed at  $28^\circ\text{C}$ . Charge transfer by rainbow trout  $\text{Na}_V1.5$  channels was significantly increased by acute warming in HEK cells, in contrast to the observations of ventricular  $I_{Na}$  (Fig. 4H).

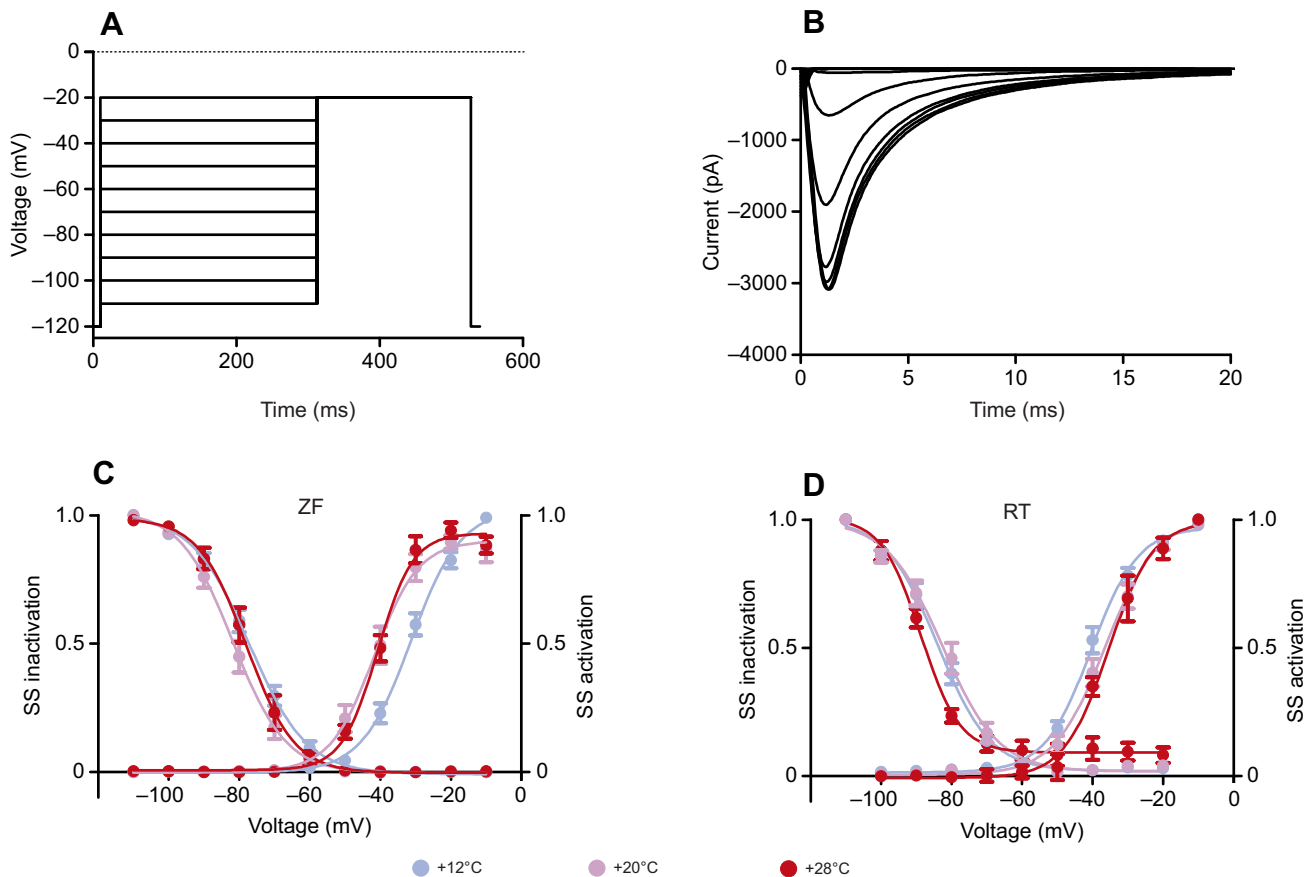

**Fig. 3. Voltage and temperature dependence of steady-state activation and inactivation of  $I_{Na}$  in ventricular myocytes of zebrafish and rainbow trout.** (A) The two-step voltage protocol used to elicit  $I_{Na}$ . (B) A representative recording from a zebrafish ventricular myocyte indicating tracings of  $I_{Na}$  at  $-20$  mV following 1 s depolarizations from  $-120$  mV to  $-110$  to  $+30$  mV. (C) Steady-state (SS) activation and inactivation of zebrafish (ZF) ventricular  $I_{Na}$  ( $N=87$  myocytes from seven fishes). (D) Steady-state activation and inactivation of rainbow trout (RT) ventricular  $I_{Na}$  ( $N=58$  myocytes from six fishes).

### Inactivation kinetics of $I_{Na}$ generated by $Na_v1.4$ and $Na_v1.5$ channels in HEK cells

The inactivation rate of  $I_{Na}$  increased with increasing temperature and with membrane depolarization. There were marked gene-specific differences in the rate of  $I_{Na}$  inactivation (Fig. 5). The rate of inactivation of  $I_{Na}$  produced by  $Na_v1.5$  channels was much slower than that produced by  $Na_v1.4$  channels for both zebrafish and trout genes ( $P<0.05$ ). In contrast to gene-specific differences, interspecies differences in inactivation rate of  $I_{Na}$  were non-existent or small. The time constant of  $I_{Na}$  inactivation of  $Na_v1.5$  channels was almost identical for zebrafish and trout variants of the channel. In contrast, the  $I_{Na}$  generated by  $Na_v1.4$  channels was faster for zebrafish than the trout channel variant at more negative voltages (at  $-30$  mV at  $20^\circ\text{C}$ , and at  $-30$  and  $-20$  mV at  $28^\circ\text{C}$ ) (Fig. 5D,F). Temperature dependence ( $Q_{10}$  values) of  $I_{Na}$  inactivation varied between 1.8 and 6.0 with no differences between channel isoforms. However, the  $Q_{10}$  value of  $I_{Na}$  inactivation rate was higher in zebrafish ventricular myocytes than in trout ventricular myocytes at voltages of  $-10$  and  $0$  mV ( $P<0.05$ ) (Table S1).

Interestingly, the rate of  $I_{Na}$  inactivation of heterologously expressed zebrafish  $Na_v1.4$  and  $Na_v1.5$   $Na^+$  channels was much faster than the inactivation kinetics of the endogenous ventricular  $I_{Na}$ . Opposite to the findings in zebrafish, the  $I_{Na}$  inactivation rate of trout  $Na_v1.5$  channels was much slower than that of trout ventricular

myocytes. In contrast, the inactivation rates of  $I_{Na}$  for heterologously expressed trout  $Na_v1.4$  channels and trout ventricular myocytes were similar.

### Steady-state activation and inactivation of $I_{Na}$ generated by $Na_v1.4$ and $Na_v1.5$ channels in HEK cells

Acute increases in temperature had only weak effects on the voltage dependence of SS activation and inactivation of  $I_{Na}$  generated by the heterologously expressed  $Na^+$  channels (Table 2; Fig. 6). The only change for the zebrafish  $I_{Na}$  produced by  $Na_v1.5$  channels was the reduced slope of SS activation at  $20$  and  $28^\circ\text{C}$  relative to that at  $12^\circ\text{C}$  ( $P<0.05$ ). Similar changes were observed for the rainbow trout  $I_{Na}$  generated by  $Na_v1.5$  channels ( $P<0.05$ ) (Fig. 6). In addition, the rainbow trout  $Na_v1.5$  channels had a positive shift in the voltage dependence and a decrease in the slope factor of the  $I_{Na}$  SS inactivation ( $P<0.05$ ) (Table 2; Fig. 6D). Elevated temperatures also reduced the slope factor of SS activation of the trout  $Na_v1.4$  channels ( $P<0.05$ ) (Table 2; Fig. 6B).

### DISCUSSION

The present results can be summarized in three major findings. (1) The properties of the endogenous  $I_{Na}$  of zebrafish and rainbow trout ventricular myocytes differ markedly in terms of heat tolerance and inactivation kinetics, with the zebrafish  $I_{Na}$  being more heat tolerant and more slowly inactivating. (2) The major  $Na^+$  channel isoforms

**Table 2. Midpoint membrane potential and slope factor of steady-state inactivation and activation for  $I_{Na}$  of zebrafish and rainbow trout ventricular myocytes and  $I_{Na}$  generated by their  $Na_V1.4$  and  $Na_V1.5$  channels in HEK cells**

|                                      | SS inactivation        |                         | SS activation            |                        |
|--------------------------------------|------------------------|-------------------------|--------------------------|------------------------|
|                                      | $V_{0.5}$ (mV)         | Slope                   | $V_{0.5}$ (mV)           | Slope                  |
| Zebrafish myocytes                   |                        |                         |                          |                        |
| 12°C                                 | -77.2±1.4 <sup>a</sup> | -7.3±0.5 <sup>a</sup>   | -30.3±1.6 <sup>a</sup>   | 6.7±0.5 <sup>a</sup>   |
| 20°C                                 | -80.6±1.8 <sup>a</sup> | -5.8±0.4 <sup>b</sup>   | -40.2±2.3 <sup>b</sup>   | 4.9±0.3 <sup>b</sup>   |
| 28°C                                 | -77.6±1.9 <sup>a</sup> | -5.3±0.6 <sup>b</sup>   | -39.6±1.8 <sup>b</sup>   | 5.1±0.7 <sup>b</sup>   |
| Zebrafish $Na_V1.4$ in HEK cells     |                        |                         |                          |                        |
| 12°C                                 | -83.5±2.1 <sup>a</sup> | -5.5±0.8 <sup>a</sup>   | -35.9±3.2 <sup>a</sup>   | 8.0±0.8 <sup>a</sup>   |
| 20°C                                 | -85.0±4.0 <sup>a</sup> | -6.5±0.6 <sup>a</sup>   | -42.4±2.5 <sup>a</sup>   | 5.4±0.4 <sup>b</sup>   |
| 28°C                                 | -76.8±2.3 <sup>a</sup> | -7.3±1.3 <sup>a</sup>   | -39.0±3.6 <sup>a</sup>   | 6.6±0.7 <sup>a,b</sup> |
| Zebrafish $Na_V1.5$ in HEK cells     |                        |                         |                          |                        |
| 12°C                                 | -76.2±2.1 <sup>a</sup> | -7.8±1.5 <sup>a</sup>   | -41.2±4.1 <sup>a</sup>   | 7.8±1.0 <sup>a</sup>   |
| 20°C                                 | -78.3±2.4 <sup>a</sup> | -8.5±1.7 <sup>a</sup>   | -33.4±1.7 <sup>a</sup>   | 7.0±0.8 <sup>a</sup>   |
| 28°C                                 | -71.1±1.7 <sup>a</sup> | -5.5±0.5 <sup>a</sup>   | -34.1±2.4 <sup>a</sup>   | 5.5±0.6 <sup>a</sup>   |
| Rainbow trout myocytes               |                        |                         |                          |                        |
| 12°C                                 | -85.1±2.0 <sup>a</sup> | -7.7±0.7 <sup>a</sup>   | -40.2±1.4 <sup>a</sup>   | 6.2±0.4 <sup>a</sup>   |
| 20°C                                 | -83.1±2.4 <sup>a</sup> | -7.6±0.5 <sup>a</sup>   | -36.9±1.7 <sup>a</sup>   | 6.5±0.3 <sup>a</sup>   |
| 28°C                                 | -89.0±1.0 <sup>a</sup> | -8.7±0.3 <sup>a</sup>   | -34.4±2.9 <sup>a</sup>   | 6.6±1.7 <sup>a</sup>   |
| Rainbow trout $Na_V1.4$ in HEK cells |                        |                         |                          |                        |
| 12°C                                 | -80.5±3.7 <sup>a</sup> | -10.1±1.9 <sup>a</sup>  | -39.8±2.5 <sup>a</sup>   | 5.2±0.9 <sup>a</sup>   |
| 20°C                                 | -81.0±3.9 <sup>a</sup> | -8.0±2.3 <sup>a</sup>   | -29.2±4.2 <sup>b</sup>   | 9.0±2.7 <sup>a</sup>   |
| 28°C                                 | -76.9±2.7 <sup>a</sup> | -8.0±1.5 <sup>a</sup>   | -33.6±2.2 <sup>a,b</sup> | 6.9±1.6 <sup>a</sup>   |
| Rainbow trout $Na_V1.5$ in HEK cells |                        |                         |                          |                        |
| 12°C                                 | -87.3±1.9 <sup>a</sup> | -8.5±0.5 <sup>a</sup>   | -39.6±2.4 <sup>a</sup>   | 7.5±0.6 <sup>a</sup>   |
| 20°C                                 | -77.9±1.9 <sup>b</sup> | -7.0±0.7 <sup>a,b</sup> | -39.1±1.6 <sup>a</sup>   | 5.4±0.4 <sup>b</sup>   |
| 28°C                                 | -72.4±2.2 <sup>b</sup> | -5.7±0.4 <sup>b</sup>   | -39.9±2.4 <sup>a</sup>   | 4.8±0.3 <sup>b</sup>   |

$V_{0.5}$ , midpoint potential; SS, steady-state. Statistically significant differences ( $P<0.05$ ) between temperatures (within species) are shown by different lower case letters.

of zebrafish and rainbow trout ventricles,  $Na_V1.5$  and  $Na_V1.4$ , respectively, show only minor interspecies differences, when expressed in HEK cells, i.e. the orthologous  $Na^+$  channel alpha subunits are functionally (heat tolerance, inactivation kinetics) similar in the same membrane matrix. (3) When expressed in HEK cells,  $I_{Na}$  generated by  $Na_V1.4$  and  $Na_V1.5$  isoforms of both species show large channel-specific differences in inactivation kinetics, with  $Na_V1.4$  being fast and  $Na_V1.5$  slow. Taken together, the species-specific properties of ventricular  $I_{Na}$  seem to be determined partly by the expressed  $Na^+$  channel alpha subunit –  $Na_V1.5$  in zebrafish and  $Na_V1.4$  in rainbow trout – and partly by the biophysical properties of the lipid matrix/ancillary subunits of the channel assembly. Notably, the better heat tolerance of  $I_{Na}$  seems to be related to the slower inactivation kinetics of  $Na^+$  channels.

The endogenous  $I_{Na}$  of zebrafish and rainbow trout ventricular myocytes have very different inactivation kinetics: the  $I_{Na}$  of zebrafish ventricular myocytes inactivates much more slowly than  $I_{Na}$  of rainbow trout ventricular myocytes. At 12°C, the inactivation time constant of the zebrafish  $I_{Na}$  was almost an order of magnitude bigger than that of the rainbow trout ( $5.0±0.7$  versus  $0.5±0.03$  ms at  $-20$  mV). This difference largely, but not completely, disappeared when the rate of  $I_{Na}$  inactivation was measured at the acclimation temperatures of the fish ( $0.8±0.09$  ms for zebrafish at 28°C versus  $0.5±0.03$  ms for trout at 12°C). As thermal acclimation does not have any effect on the inactivation kinetics of the rainbow trout ventricular  $I_{Na}$  (Haverinen and Vornanen, 2004), the differences in the inactivation rate between the two species can be regarded as adaptations of  $I_{Na}$  to the respective habitat temperatures of the species. In general, electrical excitation in nerves and muscle tissues of ectothermic animals is adapted to work best at lower temperatures

in comparison with the tissues of the endothermic animals. For instance, at the typical mammalian body temperatures (36–38°C), the AP conduction of ectothermic nerve fibres suffers from heat block (Hodgkin and Katz, 1949; Volgushev et al., 2000). The gating kinetics of the plasma membrane ion channels are probably responsible for the thermal adaptation of AP conduction, allowing APs to propagate at the proper rate and frequency at the typical habitat temperatures of the species. Because zebrafish live at warmer habitats than rainbow trout, the slow inactivation kinetics of its ventricular  $I_{Na}$  may provide better excitability at higher temperatures than the fast inactivating  $I_{Na}$  of the rainbow trout. However, when comparing the intrinsic heart rates of the two species at their acclimation temperatures (130 beats  $min^{-1}$  for zebrafish versus 60 beats  $min^{-1}$  for rainbow trout) (Aho and Vornanen, 2001; Vornanen and Hassinen, 2016), the rate of  $I_{Na}$  inactivation appears to be slow. Apparently, the rate of  $I_{Na}$  recovery from inactivation does not limit heart rate in zebrafish, although this was not experimentally confirmed.

The slow rate of  $I_{Na}$  inactivation in zebrafish ventricular myocytes may protect against heat-induced impairment of electrical excitability (Park et al., 2016; Touska et al., 2018). This is consistent with our hypothesis that  $Na^+$  channels with slow gating kinetics better maintain electrical excitability at high temperatures (Vornanen, 2020). Indeed, findings from the pain receptors of human skin strongly suggest that the slow gating kinetics of  $Na^+$  channels are needed for heat resistance of  $I_{Na}$  (Touska et al., 2018). At mammalian body temperatures, most  $Na^+$  channel isoforms operate close to their optimum and a slight increase in temperature above the typical body temperature limits the density and charge transfer of  $I_{Na}$  (Touska et al., 2018). However,  $I_{Na}$  of the mammalian pain receptors works well at temperatures much above body temperature (43–50°C), largely owing to the thermal properties of the  $Na_V1.9$   $Na^+$  channel isoform. Inactivation kinetics of this channel are more than an order of magnitude slower than those of  $Na_V1.1$ – $Na_V1.8$  isoforms (Balbi et al., 2017; Touska et al., 2018). Due to the slow inactivation of  $Na_V1.9$ , it provides enough charge for depolarization of the plasma membrane at high temperatures. Analogously, the slow inactivation rate of the zebrafish cardiac  $I_{Na}$  provides more inward charge for the same peak amplitude of  $I_{Na}$  or the same number of active  $Na^+$  channels than the fast inactivating trout cardiac  $I_{Na}$  (Fig. 4). Indeed, the charge transfer/peak current ratio of the zebrafish  $I_{Na}$  is much higher at 28°C than that of the rainbow trout  $I_{Na}$  at 12°C.

The species-specific difference in the inactivation kinetics of the ventricular  $I_{Na}$  is partly explained by the difference in the alpha subunit composition of the  $Na^+$  channels. In zebrafish ventricular myocytes, the main alpha subunit is  $Na_V1.5$ , which at the transcript level represents 83.1% of all ventricular  $Na^+$  channels. Transcripts of the  $Na_V1.4$  comprise only 16.2% of the zebrafish ventricular  $Na^+$  channels (Haverinen et al., 2018). In the ventricle of the rainbow trout, the situation is opposite:  $Na_V1.4$  channels form 80% of all  $Na^+$  channel transcripts, while  $Na_V1.5$  channels represent only 20% of the total channel population (Haverinen et al., 2007). Thus, in zebrafish ventricle  $Na^+$  channels are mainly of the slow isoform, while in the ventricle of the rainbow trout they are mainly the fast isoform. Based on their tissue distribution in mammals,  $Na_V1.5$  and  $Na_V1.4$  are often called ‘cardiac’ and ‘skeletal’ isoforms, respectively (Zimmer et al., 2015). The mammalian  $Na_V1.4$  is kinetically faster than  $Na_V1.5$  and therefore functionally better at eliciting fast twitches at high frequencies in skeletal muscle fibres (Wang et al., 1996; Sheets and Hanck, 1999). Although the classification of  $Na_V1.5$  and  $Na_V1.4$  to cardiac and skeletal



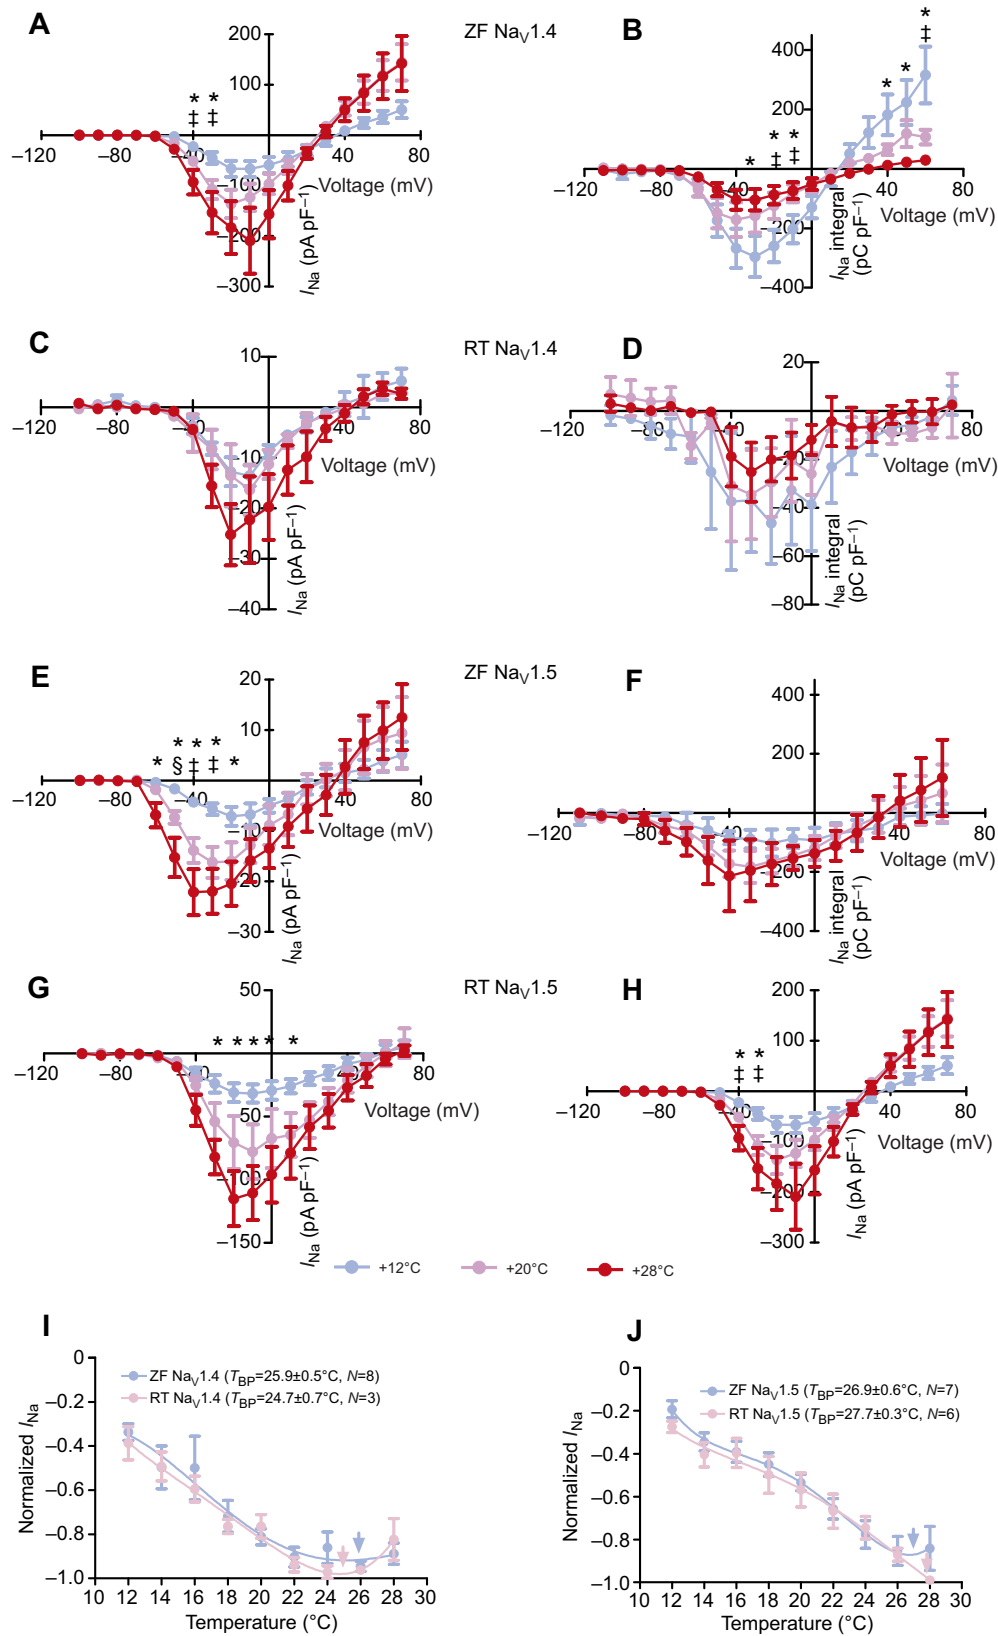

**Fig. 4. Voltage and temperature dependence of current density and charge transfer of  $I_{Na}$  generated by zebrafish and rainbow trout  $Na_v1.4$  and  $Na_v1.5$  channels in HEK cells.** (A–D) Mean results ( $\pm$ s.e.m.) for current–voltage relationship (A,C) and charge transfer (B,D) of  $I_{Na}$  at three different temperatures for zebrafish (ZF;  $N=49$  cells) (A,B) and rainbow trout (RT;  $N=15$  cells) (C,D)  $Na_v1.4$  channels. (E–H) Mean results ( $\pm$ s.e.m.) for current–voltage relationship (E,G) and charge transfer (F,H) of  $I_{Na}$  at three different temperatures for ZF ( $N=30$  cells) (E,F) and RT ( $N=27$  cells) (G,H)  $Na_v1.5$  channels. (I,J) Current density of  $I_{Na}$  in heat ramp experiments with ZF and RT  $Na_v1.4$  (I) and  $Na_v1.5$  (J) channels. Arrows (blue and red) mark the breakpoint temperature of each curve. Number of tested cells are shown in the figure. Statistically significant differences ( $P<0.05$ ) are shown as follows: \*12 versus 28°C; †12 versus 20°C; §20 versus 28°C.

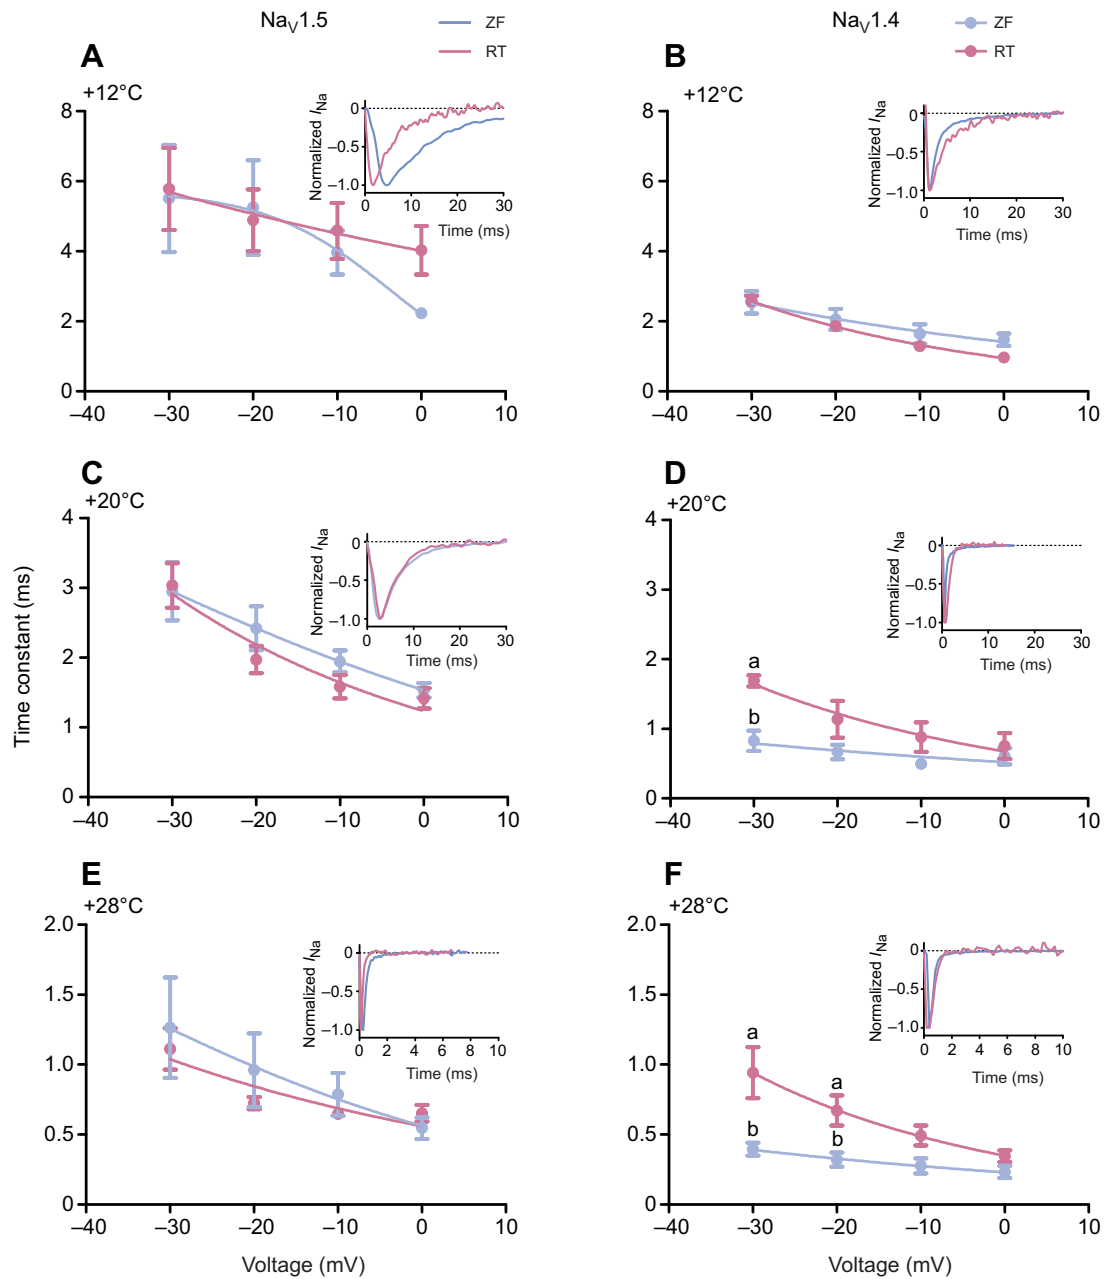

**Fig. 5. Temperature dependence of inactivation kinetics of  $I_{Na}$  for zebrafish  $Na_V1.4$  and  $Na_V1.5$  channels in HEK cells.**  $I_{Na}$  was elicited from the holding potential of  $-120$  mV to  $-30$  to  $10$  mV for  $30$  ms. (A–F) Means ( $\pm$ s.e.m.) of inactivation time constant ( $\tau_i$ ) for  $Na_V1.5$  (A, C, E) and  $Na_V1.4$  (B, D, F) at  $12$ ,  $20$  and  $28^\circ\text{C}$  as indicated. The results are from  $39$  and  $42$  cells from zebrafish (ZF) and rainbow trout (RT) channels, respectively. Representative tracings of  $I_{Na}$  at  $-30$  mV are shown in the inset to each panel. Statistically significant differences ( $P < 0.05$ ) between ZF and RT are shown by dissimilar letters (a and b).

isoforms, respectively, is not valid for fish, the kinetic similarities between the orthologous mammalian and piscine  $Na^+$  channels persist. The fast inactivation kinetics of the rainbow trout  $Na_V1.4$  can be regarded adaptive for heart function of this cold-dwelling fish.

The dominance of  $Na_V1.5$  alpha subunits in the zebrafish heart only partially explains the slow inactivation kinetics of the ventricular  $I_{Na}$ . Unlike the rainbow trout, where the inactivation rate of  $Na_V1.4$  channels in HEK cells relatively closely matches the inactivation rate of the endogenous ventricular  $I_{Na}$ , in zebrafish there is a large difference in the inactivation kinetics of the heterologously expressed  $Na_V1.5$  and the endogenous ventricular  $I_{Na}$ . As  $Na_V1.4$  and  $Na_V1.5$   $Na^+$  channel alpha subunits of zebrafish and rainbow

trout share the inactivation kinetics in the heterologous environment of HEK cells, the slow inactivation rate of the zebrafish ventricular  $I_{Na}$  is probably partly due to the general biophysical properties of the bulk lipid bilayer of ventricular myocytes in the membrane domain where they are located (Lundbaek et al., 2004). Phospholipid bilayer composition of the plasma membrane affects function of the integral membrane proteins mainly in a non-specific manner by its biophysical properties (Lundbaek et al., 2004). Elasticity (stiffness) of the lipid bilayer, determined by the lipid composition, regulates the inactivation of the voltage-gated  $Na^+$  channels. Decrease in membrane stiffness induced by amphiphiles like Triton-X or  $\beta$ -octyl-glucoside accelerate the rate of  $I_{Na}$  inactivation, while increase in membrane stiffness due to elevated

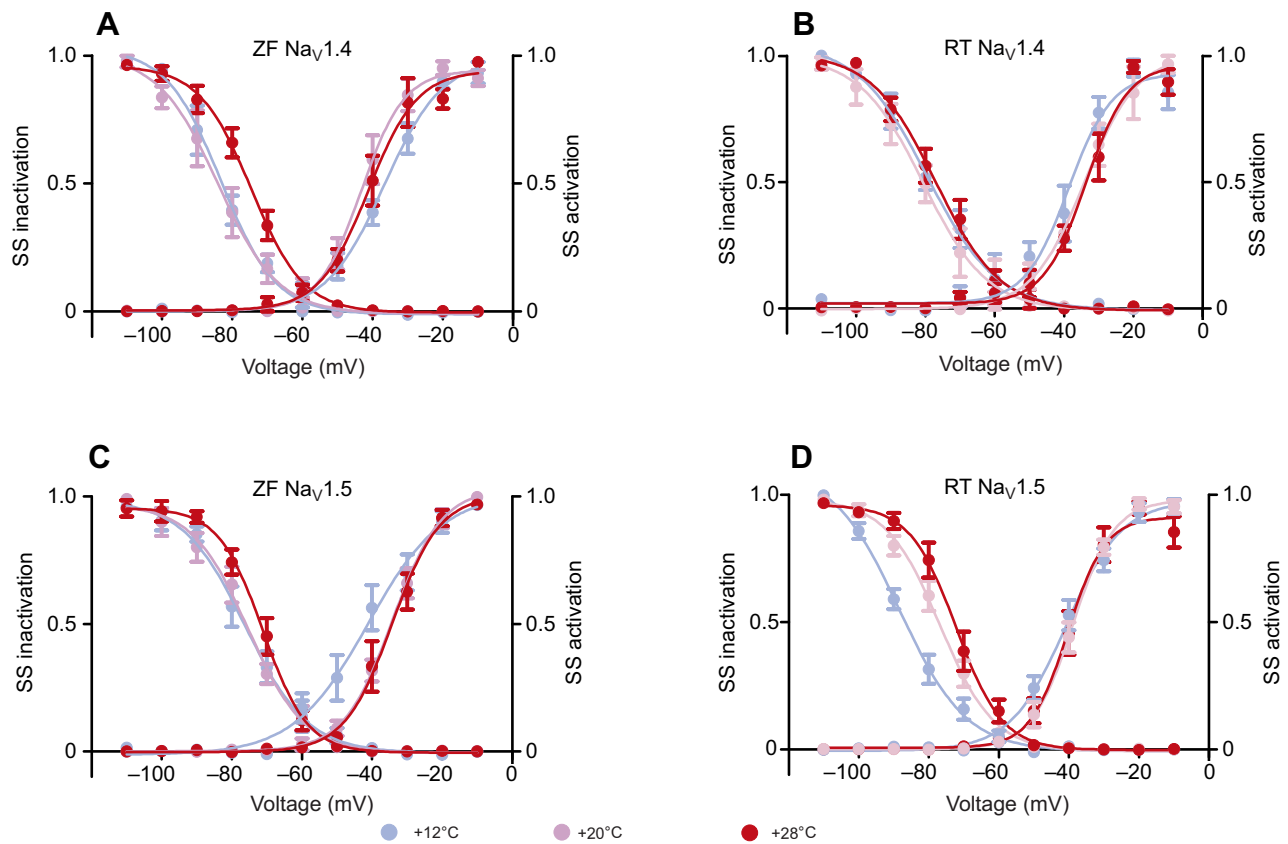

**Fig. 6. Voltage and temperature dependence of steady-state activation and inactivation of  $I_{Na}$  for  $Na_v1.4$  and  $Na_v1.5$  channels in HEK cells.** The voltage protocol was the same as in Fig. 2. (A,B) Steady-state activation and inactivation of zebrafish (ZF;  $N=49$  cells) (A) and rainbow trout (RT;  $N=33$  cells) (B)  $Na_v1.4$  channels. (C,D) Steady-state (SS) activation and inactivation of zebrafish ( $N=49$  cells) (C) and rainbow trout ( $N=50$  cells) (D)  $Na_v1.5$  channels.

cholesterol content decreases the rate of  $I_{Na}$  inactivation (Lundback et al., 2004). Therefore, it is possible that the lipid composition of the sarcolemma in zebrafish ventricular myocytes differs from that of HEK cells and rainbow trout myocytes, and results in increased stiffness, which slows the rate of  $I_{Na}$  inactivation.

Although we do not have a complete answer about the slow inactivation rate of the zebrafish ventricular  $I_{Na}$ , some possible explanations (in addition to membrane stiffness) can be mentioned to guide future studies.  $Na^+$  channels are heteromultimers of large pore-forming alpha subunits and small accessory beta subunits. Beta subunits are needed for proper transportation of the alpha subunits into the plasma membrane and they may also affect kinetics of the  $I_{Na}$ . However, beta subunits are unlikely to cause the slow inactivation of the zebrafish  $I_{Na}$  as they tend to enhance the rate of  $Na^+$  channel inactivation and recovery from inactivation (Chen and Cannon, 1995; Goldin, 2003). A more likely contributing factor is the fibroblast growth factor orthologous factor 2 (FGF2), which binds to the inactivation domain of the C-terminus in the  $Na^+$  channel alpha subunit and strongly slows the rate of inactivation (Liu et al., 2003; Li et al., 2020). Interestingly, FGF2 knock-out mice are highly sensitive to temperature change and show more cardiac conduction defects when their core body temperature is elevated (Park et al., 2016). Future studies should examine the role of FGFs in temperature dependence of electrical excitability of the fish heart.

Acute heat challenge experiments indicated that the zebrafish ventricular  $I_{Na}$  is much more resistant to high temperatures than the rainbow trout  $I_{Na}$ . Thus, the heat tolerance of  $I_{Na}$  seems to positively

correlate with the upper thermal tolerance of the fish and its heart rate, although in both species the optimum temperature of  $I_{Na}$  is lower than the critical thermal maximum temperature of the fish and the  $T_{BP}$  of the intrinsic heart rate (Beitinger, 2000; Aho and Vornanen, 2001; Cortemeglia and Beitinger, 2005; López-Olmeda and Sánchez-Vázquez, 2011; Vornanen and Hassinen, 2016). It is clear that  $I_{Na}$  of the trout ventricle would be almost non-functional at the acclimation temperature of the zebrafish, and it is likely that the kinetics of the zebrafish  $I_{Na}$  would be too slow for the trout heart at freezing temperatures.

Warming-induced decrease of heart rate is shown to be caused by atrioventricular block, probably due to the reduced excitability of the ventricle (Haverinen and Vornanen, 2020). Therefore, the thermal properties of  $I_{Na}$  are likely to affect the species-specific  $T_{BP}$  of heart rate. Warming-induced decrease of  $I_{Na}$  and simultaneous increase in membrane  $K^+$  leak via  $I_{K1}$  results in source-sink mismatch, which may prevent AP generation (Vornanen, 2016; Haverinen and Vornanen, 2020; Vornanen, 2020). At low temperatures there is some excess of  $I_{Na}$  relative to the membrane leak via  $I_{K1}$  ( $I_{Na}/I_{K1} \geq 1.0$ ) called safety factor. When temperature rises the charge transfer of  $I_{Na}$  starts to decline (at the species-specific  $T_{BP}$ ) due to increased rate of inactivation: the safety factor is lost ( $I_{Na}/I_{K1} < 1.0$ ) and excitation fails. In this respect, the difference in heat tolerance between the ventricular  $I_{Na}$  of rainbow trout and the  $I_{Na}$  generated by the heterologously expressed  $Na_v1.4$  and  $Na_v1.5$  channels of the trout may be important. Expression of trout  $I_{Na}$  in the HEK cell membrane makes it much more heat tolerant than it is in the native membrane surroundings. Notably, when zebrafish and

trout Na<sub>v</sub>1.4 and Na<sub>v</sub>1.5 were expressed in HEK cells, inactivation rate and heat tolerance of I<sub>Na</sub> were similar for the orthologous channels. It seems that the biophysical properties of the mammalian cell membrane shift the thermal tolerance window of the trout Na<sup>+</sup> channels to higher temperatures which would, however, be suboptimal at the habitat temperature of the cold-dwelling fish.

### Summary and perspectives

Heat tolerance and inactivation kinetics of I<sub>Na</sub> differ strongly between zebrafish and rainbow trout ventricular myocytes. In contrast, heat tolerance and inactivation kinetics of Na<sub>v</sub>1.4 and Na<sub>v</sub>1.5 channels of zebrafish and rainbow trout are similar when expressed in the same cellular environment of HEK cells. Species-specific thermal adaptation of the ventricular I<sub>Na</sub> is largely achieved by expressing a specific alpha isoform subunit of Na<sup>+</sup> channel: the slowly inactivating Na<sub>v</sub>1.5 in zebrafish that tolerate higher temperatures, and the fast inactivating Na<sub>v</sub>1.4 in rainbow trout that favour cold waters. Differences in elasticity (stiffness) of the lipid bilayer and/or accessory protein components may also be involved in the thermal adaptation of I<sub>Na</sub>. These findings are consistent with the hypothesis that slow Na<sup>+</sup> channel kinetics are associated with increased heat tolerance of cardiac excitation. Future studies should examine the extent to which these components are flexible under temperature acclimation and therefore able to accommodate the electrical excitability of the heart for seasonal temperature changes and peak summer temperatures. As electrical excitability is regulated in basically the same way in all excitable cells, studying the biophysical properties of neuronal and muscular I<sub>Na</sub> could provide clues to its role in thermal homeostasis and death of ectotherms.

### Acknowledgements

We would like to thank Kontiolahti fish farm for providing the trout. Anita Kervinen is acknowledged for taking care of the fish at the university and preparing solutions for experiments.

### Competing interests

The authors declare no competing or financial interests.

### Author contributions

Conceptualization: M.V.; Methodology: J.H., I.D., M.H.; Investigation: J.H., I.D., D.V.A., M.H.; Writing - original draft: J.H., D.V.A., M.H.; Writing - review & editing: M.V.; Visualization: J.H., I.D.; Project administration: M.V.; Funding acquisition: M.V.

### Funding

The present study was funded by the Academy of Finland (Research Council for Biosciences and Environment; project number 15051) to M.V. and by the Interdisciplinary Scientific and Educational School of Moscow University 'Molecular Technologies of the Living Systems and Synthetic Biology' to D.V.A.

### References

**Abramochkin, D. V., Haverinen, J., Mitenkov, Y. A. and Vornanen, M.** (2019). Temperature- and external K<sup>+</sup>-dependence of electrical excitation in ventricular myocytes of cod-like fishes. *J. Exp. Biol.* **222**, jeb193607. doi:10.1242/jeb.193607

**Aho, E. and Vornanen, M.** (2001). Cold-acclimation increases basal heart rate but decreases its thermal tolerance in rainbow trout (*Oncorhynchus mykiss*). *J. Comp. Physiol. B* **171**, 173-179. doi:10.1007/s003600000171

**Alderman, S. L., Klaiman, J. M., Deck, C. A. and Gillis, T. E.** (2012). Effect of cold acclimation on troponin I isoform expression in striated muscle of rainbow trout. *Am. J. Physiol.* **303**, R168-R176. doi:10.1152/ajpregu.00127.2012

**Angilletta, M. J., Jr., Niewiarowski, P. H. and Navas, C. A.** (2002). The evolution of thermal physiology in ectotherms. *J. Therm. Biol.* **27**, 249-268. doi:10.1016/S0306-4565(01)00094-8

**Balbi, P., Massobrio, P. and Hellgren Kotaleski, J.** (2017). A single Markov-type kinetic model accounting for the macroscopic currents of all human voltage-gated sodium channel isoforms. *PLoS One* **13**, e1005737. doi:10.1371/journal.pcbi.1005737

**Beers, J. M. and Sidell, B. D.** (2011). Thermal tolerance of Antarctic notothenioid fishes correlates with level of circulating hemoglobin. *Physiol. Biochem. Zool.* **84**, 353-362. doi:10.1086/660191

**Beitinger, T. L.** (2000). Temperature tolerances of North American freshwater fishes exposed to dynamic changes in temperature. *Env. Biol. Fish.* **58**, 237-275. doi:10.1023/A:1007676325825

**Chen, C. and Cannon, S. C.** (1995). Modulation of Na<sup>+</sup> channel inactivation by the β1 subunit: a deletion analysis. *Pflüg. Arch. Eur. J. Physiol.* **431**, 186-195. doi:10.1007/BF00410190

**Clark, T. D., Sandblom, E. and Jutfelt, F.** (2013). Aerobic scope measurements of fishes in an era of climate change: respirometry, relevance and recommendations. *J. Exp. Biol.* **216**, 2771-2782. doi:10.1242/jeb.084251

**Cortemeglia, C. and Beitinger, T. L.** (2005). Temperature tolerance of wild-type and red transgenic zebra danios. *Trans. Am. Fish. Soc.* **134**, 1431-1437. doi:10.1577/T04-197.1

**Drost, H. E., Fisher, J., Randall, F., Kent, D., Carmack, E. C. and Farrell, A. P.** (2016). Upper thermal limits of the hearts of Arctic cod *Boreogadus saida*: adults compared with larvae. *J. Fish Biol.* **88**, 718-726. doi:10.1111/jfb.12807

**Fields, P. A.** (2001). Review: protein function at thermal extremes: balancing stability and flexibility. *Comp. Biochem. Physiol. A* **129A**, 417-431. doi:10.1016/S1095-6433(00)00359-7

**Glasauer, S. M. K. and Neuhauss, S. C. F.** (2014). Whole-genome duplication in teleost fishes and its evolutionary consequences. *Mol. Genet. Genomics* **289**, 1045-1060. doi:10.1007/s00438-014-0889-2

**Goldin, A. L.** (2003). Mechanisms of sodium channel inactivation. *Curr. Opin. Neurobiol.* **13**, 284-290. doi:10.1016/S0959-4388(03)00065-5

**Gracey, A. Y., Fraser, E. J., Li, W., Fang, Y., Taylor, R. R., Rogers, J., Brass, A. and Cossins, A. R.** (2004). Coping with cold: an integrative, multitissue analysis of the transcriptome of a poikilothermic vertebrate. *Proc. Natl. Acad. Sci. USA* **101**, 16970-16975. doi:10.1073/pnas.0403627101

**Hassinen, M., Dzumaniiazova, I., Abramochkin, D. V. and Vornanen, M.** (2021). Ionic basis of atrioventricular conduction: ion channel expression and sarcolemmal ion currents of the atrioventricular canal of the rainbow trout (*Oncorhynchus mykiss*) heart. *J. Comp. Physiol. B* **191**, 327-346. doi:10.1007/s00360-021-01344-2

**Haverinen, J. and Vornanen, M.** (2004). Temperature acclimation modifies Na<sup>+</sup> current in fish cardiac myocytes. *J. Exp. Biol.* **207**, 2823-2833. doi:10.1242/jeb.011103

**Haverinen, J. and Vornanen, M.** (2020). Reduced ventricular excitability causes atrioventricular block and depression of heart rate in fish at critically high temperatures. *J. Exp. Biol.* **223**, jeb.225227. doi:10.1242/jeb.225227

**Haverinen, J., Hassinen, M. and Vornanen, M.** (2007). Fish cardiac sodium channels are tetrodotoxin sensitive. *Acta Physiol.* **191**, 197-204. doi:10.1111/j.1748-1716.2007.01734.x

**Haverinen, J., Hassinen, M., Korajoki, H. and Vornanen, M.** (2018). Cardiac voltage-gated sodium channel expression and electrophysiological characterization of the sodium current in the zebrafish (*Danio rerio*) ventricle. *Prog. Biophys. Mol. Biol.* **138**, 59-68. doi:10.1016/j.pbiomolbio.2018.04.002

**Hille, B.** (2001). *Ion Channels of Excitable Membranes*, p. 814. Sunderland, MA, USA: Sinauer Associates.

**Hodgkin, A. L. and Katz, B.** (1949). The effect of temperature on the electrical activity of the giant axon of the squid. *J. Physiol.* **109**, 240-249. doi:10.1113/jphysiol.1949.sp004388

**Hokanson, K. E. F., Kleiner, C. F. and Thorslund, T. W.** (1977). Effects of constant temperatures and diel temperature fluctuations on specific growth and mortality rates and yield of juvenile rainbow trout, *Salmo gairdneri*. *J. Fish. Res. Board. Can.* **34**, 639-648. doi:10.1139/f77-100

**Johnston, I. A. and Bennett, A. F.** (2008). *Animals and Temperature: Phenotypic and Evolutionary Adaptation*. Cambridge, UK: Cambridge University Press.

**Lagerspetz, K. Y. H.** (1987). Temperature effects on different organization levels in animals. *Symp. Soc. Exp. Biol.* **41**, 429-449.

**Li, Q., Zhai, Z. and Li, J.** (2020). Fibroblast growth factor homologous factors are potential ion channel modifiers associated with cardiac arrhythmias. *Eur. J. Pharmacol.* **871**, 172920. doi:10.1016/j.ejphar.2020.172920

**Liu, C. J., Dib-Hajj, S. D., Renganathan, M., Cummins, T. R. and Waxman, S. G.** (2003). Modulation of the cardiac sodium channel Na<sub>v</sub>1.5 by fibroblast growth factor homologous factor 1B. *J. Biol. Chem.* **278**, 1029-1036. doi:10.1074/jbc.M207074200

**López-Olmeda, J. F. and Sánchez-Vázquez, F. J.** (2011). Thermal biology of zebrafish (*Danio rerio*). *J. Therm. Biol.* **36**, 91-104. doi:10.1016/j.jtherbio.2010.12.005

**Lundbaek, J. A., Birn, P., Hansen, A. J., Sogaard, R., Nielsen, C., Girshman, J., Bruno, M. J., Tape, S. E., Egebjerg, J., Greathouse, D. V. et al.** (2004). Regulation of sodium channel function by bilayer elasticity: the importance of hydrophobic coupling. Effects of Micelle-forming amphiphiles and cholesterol. *J. Gen. Physiol.* **123**, 599-621. doi:10.1085/jgp.200308996

**MacMillan, H. A.** (2019). Dissecting cause from consequence: a systematic approach to thermal limits. *J. Exp. Biol.* **222**, jeb.191593. doi:10.1242/jeb.191593

**Molina, C. E., Gesser, H., Llach, A., Tort, L. Hove-Madsen, L.** (2007). Modulation of membrane potential by an acetylcholine-activated potassium current in trout



- atrial myocytes. *Am. J. Physiol.* **292**, R388-R395. doi:10.1152/ajpregu.00499.2005
- Park, D. S., Shekhar, A., Marra, C., Lin, X., Vasquez, C., Solinas, S., Kelley, K., Morley, G., Goldfarb, M. and Fishman, G. I.** (2016). *Fhf2* gene deletion causes temperature-sensitive cardiac conduction failure. *Nat. Commun.* **7**, 12966. doi:10.1038/ncomms12966
- Podrabsky, J. E. and Somero, G. N.** (2004). Changes in gene expression associated with acclimation to constant temperatures and fluctuating daily temperatures in an annual killifish *Austrofundulus limnaeus*. *J. Exp. Biol.* **207**, 2237-2254. doi:10.1242/jeb.01016
- Sheets, M. F. and Hanck, D. A.** (1999). Gating of skeletal and cardiac muscle sodium channels in mammalian cells. *J. Physiol.* **514**, 425-436. doi:10.1111/j.1469-7793.1999.425ae.x
- Somero, G. N.** (1995). Proteins and temperature. *Annu. Rev. Physiol.* **57**, 43-68. doi:10.1146/annurev.ph.57.030195.000355
- Somero, G. N. and DeVries, A. L.** (1967). Temperature tolerance of some Antarctic fishes. *Science* **156**, 257-258. doi:10.1126/science.156.3772.257
- Tattersall, G. J., Sinclair, B. J., Withers, P. C., Fields, P. A., Seebacher, F., Cooper, C. E. and Maloney, S. K.** (2012). Coping with thermal challenges: physiological adaptations to environmental temperatures. *Compr. Physiol.* **2**, 2151-2202. doi:10.1002/cphy.c110055
- Touska, F., Turnquist, B., Vlachova, V., Reeh, P. W., Leffler, A. and Zimmermann, K.** (2018). Heat-resistant action potentials require TTX-resistant sodium channels  $Na_v1.8$  and  $Na_v1.9$ . *J. Gen. Physiol.* **150**, 1125-1144. doi:10.1085/jgp.201711786
- Volgushev, M., Vidyasagar, T. R., Chistiakova, M., Yousef, T. and Eysel, U. T.** (2000). Membrane properties and spike generation in rat visual cortical cells during reversible cooling. *J. Physiol.* **522**, 59-76. doi:10.1111/j.1469-7793.2000.0059m.x
- Vornanen, M.** (1997). Sarcolemmal Ca influx through L-type Ca channels in ventricular myocytes of a teleost fish. *Am. J. Physiol.* **272**, R1432-R1440. doi:10.1152/ajpregu.1997.272.5.R1432
- Vornanen, M.** (2016). The temperature dependence of electrical excitability of fish heart. *J. Exp. Biol.* **219**, 1941-1952. doi:10.1242/jeb.128439
- Vornanen, M.** (2020). Feeling the heat: source-sink mismatch as a mechanism underlying the failure of thermal tolerance. *J. Exp. Biol.* **223**, jeb225680. doi:10.1242/jeb.225680
- Vornanen, M. and Hassinen, M.** (2016). Zebrafish heart as a model for human cardiac electrophysiology. *Channels* **10**, 101-110. doi:10.1080/19336950.2015.1121335
- Vornanen, M., Haverinen, J. and Egginton, S.** (2014). Acute heat tolerance of cardiac excitation in the brown trout (*Salmo trutta fario*). *J. Exp. Biol.* **217**, 299-309. doi:10.1242/jeb.091272
- Vornanen, M., Hassinen, M., Koskinen, H. and Krasnov, A.** (2005). Steady-state effects of temperature acclimation on the transcriptome of the rainbow trout heart. *Am. J. Physiol.* **289**, R1177-R1184. doi:10.1152/ajpregu.00157.2005
- Vornanen, M., Ryökkinen, A. and Nurmi, A.** (2002). Temperature-dependent expression of sarcolemmal  $K^+$  currents in rainbow trout atrial and ventricular myocytes. *Am. J. Physiol.* **282**, R1191-R1199. doi:10.1152/ajpcell.00475.2001
- Wang, D. W., George, A. L. and Bennett, P. B.** (1996). Comparison of heterologously expressed human cardiac and skeletal muscle sodium channels. *Biophys. J.* **70**, 238-245. doi:10.1016/S0006-3495(96)79566-8
- Westerfield, M.** (2007). *The Zebrafish Book: A guide for the laboratory use of zebrafish Danio (Brachydanio rerio)*. University of Oregon Press.
- Zavodszky, P., Kardos, J., Svingor, A. and Petsko, G. A.** (1998). Adjustment of conformational flexibility is a key event in the thermal adaptation of proteins. *Proc. Natl. Acad. Sci. USA* **95**, 7406-7411. doi:10.1073/pnas.95.13.7406
- Zimmer, T., Haufe, V. and Blechschmidt, S.** (2015). Voltage-gated sodium channels in the mammalian heart. *Global Cardiology Science and Practice* **2014**, 58. doi:10.5339/gcsp.2014.58
